# Supplementary material for: Analysis of Large-Scale Mutagenesis Data To Assess the Impact of Single Amino Acid Substitutions
Source: Oxford University Press journal article supplement (doi:10.1534/genetics.117.300064), 2017-07-26
Supplement: tables1.xls [file tables1.xls]

## Sheet: suppTable1.csv
AA	N	P.value	Bonferroni.corrected.P.value
A	823	4.37e-25	8.73e-24
C	859	1.26e-11	2.52e-10
D	826	1.01e-24	2.03e-23
E	809	6.82e-12	1.36e-10
F	851	0.0117	0.234
G	836	0.141	2.82
H	870	0.445	8.9
I	815	0.906	18.1
K	812	2e-17	4e-16
L	788	0.000814	0.0163
M	866	3.77e-07	7.53e-06
N	850	0.556	11.1
P	847	2.05e-64	4.1e-63
Q	843	0.633	12.7
R	832	7.96e-10	1.59e-08
S	827	3.06e-27	6.11e-26
T	828	9.99e-21	2e-19
V	836	1.34e-08	2.68e-07
W	876	1.22e-31	2.44e-30
Y	864	0.0168	0.336
